# Supplementary material for: Flame spheroidisation of dense and porous Ca2Fe2O5 microspheres
Source: Royal Society of Chemistry journal article supplement (doi:10.1039/d0ma00564a), 2020-01-01
Supplement: d0ma00564a1.pdf [file d0ma00564a1.pdf]

## Supplementary Information

### Flame spheroidisation of dense and porous $\text{Ca}_2\text{Fe}_2\text{O}_5$ microspheres

Jesús Molinar Díaz<sup>a</sup>, Sabrin Abdus Samad<sup>a</sup>, Elisabeth Steer<sup>b</sup>, Nigel Neate<sup>b,c</sup>, Hannah Constantin<sup>c</sup>, Md Towhidul Islam<sup>a,d</sup>, Paul D Brown<sup>a,b</sup> Ifty Ahmed<sup>a\*</sup>

<sup>a</sup> Advanced Materials Research Group, Faculty of Engineering, University of Nottingham, Nottingham NG7 2RD, UK

<sup>b</sup> Nanoscale and Microscale Research Centre, University of Nottingham, University Park, Nottingham, NG7 2RD, UK

<sup>c</sup> Department of Mechanical, Materials and Manufacturing Engineering, Faculty of Engineering, University of Nottingham, University Park, Nottingham, NG7 2RD, UK

<sup>d</sup> Department of Applied Chemistry and Chemical Engineering, Faculty of Engineering, Noakhali Science and Technology University, Noakhali 3814, Bangladesh

\* Corresponding author. Faculty of Engineering, University of Nottingham, University Park, Nottingham, NG7 2RD, UK. E-mail address: [ifty.ahmed@nottingham.ac.uk](mailto:ifty.ahmed@nottingham.ac.uk)

## 1.0 Structural Analysis

Complementary XRD investigations were performed to establish the crystalline structures of the  $\text{Fe}_3\text{O}_4$  and  $\text{CaCO}_3$  powders, both pre and post FS-processing, to clarify the structural transformations of these materials when processed individually (Figure S1). The structures of the starting materials were confirmed as  $\text{Fe}_3\text{O}_4$  and  $\text{CaCO}_3$  (Figures S1c and S1d, respectively). FS-processed magnetite powders (in the form of solid microspheres from SEM observations) were found to remain predominantly as  $\text{Fe}_3\text{O}_4$ , with some evidence for the development of trace amounts of  $\text{Fe}_2\text{O}_3$  (Figure S1a). FS-processed porogen exhibited diffraction peaks attributable to both  $\text{CaCO}_3$  and  $\text{CaO}$  (Figure S1b).

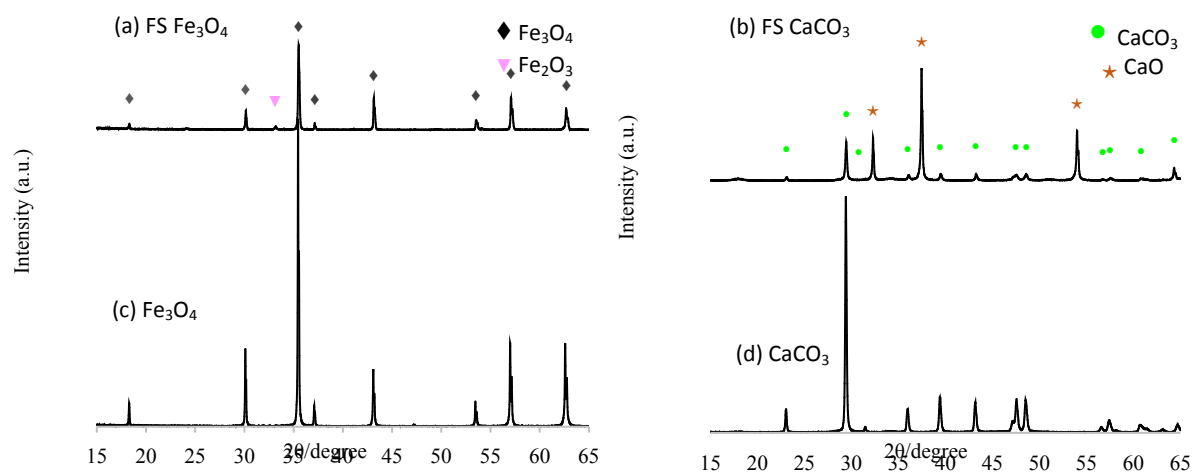

**Fig. S1.** XRD data for: (a) FS-processed  $\text{Fe}_3\text{O}_4$ ; (b) FS-processed  $\text{CaCO}_3$ ; (c)  $\text{Fe}_3\text{O}_4$  starting powder; and (d)  $\text{CaCO}_3$  starting porogen

## 2.0 Magnetic expression

A simple experiment using a magnet confirmed the sieved FS-processed  $\text{Ca}_2\text{Fe}_2\text{O}_5$  products to indeed be magnetic (Figure S2).

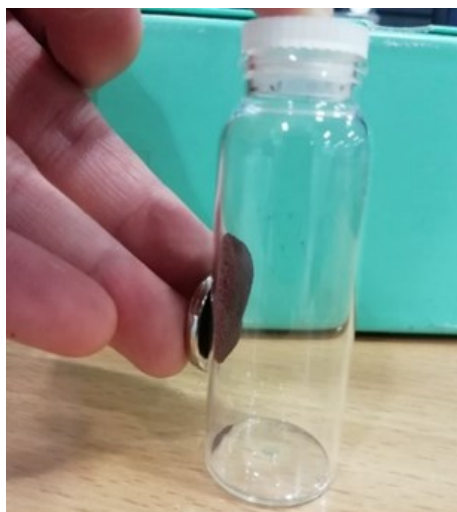

**Fig. S2.** Magnet placed next to FS-processed  $\text{Fe}_3\text{O}_4$ : $\text{CaCO}_3$ , following sieving, demonstrating the  $\text{Ca}_2\text{Fe}_2\text{O}_5$  microsphere products to be magnetic.

### 3.0 Mineral Mapping

**Table S1. Mineral reference**

| Mineral                                                         | Ca%  | Fe%  | O%    |
|-----------------------------------------------------------------|------|------|-------|
| Ca <sub>2</sub> Fe <sub>2</sub> O <sub>5</sub> (srebrodolskite) | 19.1 | 57   | 23.9  |
| Fe <sub>3</sub> O <sub>4</sub>                                  | -    | 72.4 | 27.64 |
| Compound 1                                                      | 3.6  | 73.8 | 22.6  |
| Compound 2                                                      | 9.6  | 67.3 | 23.1  |
| Compound 3                                                      | 15.1 | 61.3 | 23.6  |
| Compound 4                                                      | 48.4 | 28.9 | 22.6  |

**Table S2. Modal mineralogy**

| Mineral                                                         | Particles | Weight %     |
|-----------------------------------------------------------------|-----------|--------------|
| Ca <sub>2</sub> Fe <sub>2</sub> O <sub>5</sub> (srebrodolskite) | 1501      | <b>99.75</b> |
| Fe <sub>3</sub> O <sub>4</sub>                                  | 5         | 0.01         |
| Compound 1                                                      | 2         | 0.01         |
| Compound 2                                                      | 3         | 0.01         |
| Compound 3                                                      | 24        | 0.08         |
| Compound 4                                                      | 25        | 0.14         |
| Unknown                                                         | 46        | 0.00         |

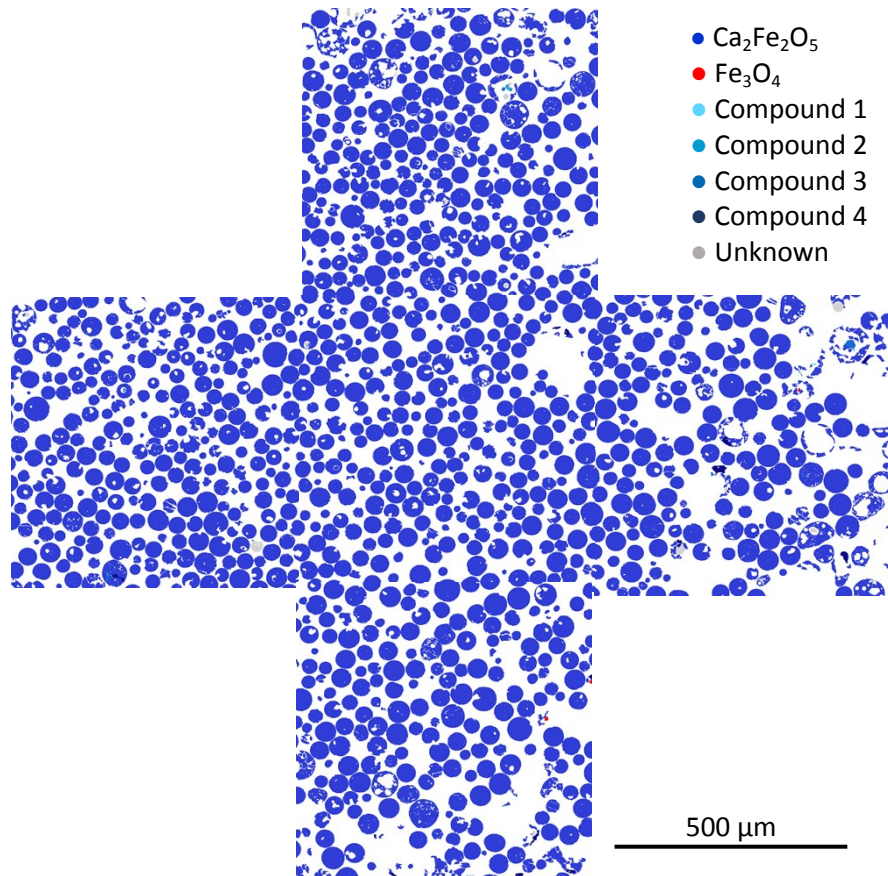

**Fig. S3.** Full MLA compositional analysis of FS-processed Fe<sub>3</sub>O<sub>4</sub>:CaCO<sub>3</sub>, following sieving and sectioning, demonstrating very high levels of Ca<sub>2</sub>Fe<sub>2</sub>O<sub>5</sub>, along with very low levels of related CaFeO phases and Fe<sub>3</sub>O<sub>4</sub>.

#### 4.0 Products before and after FS

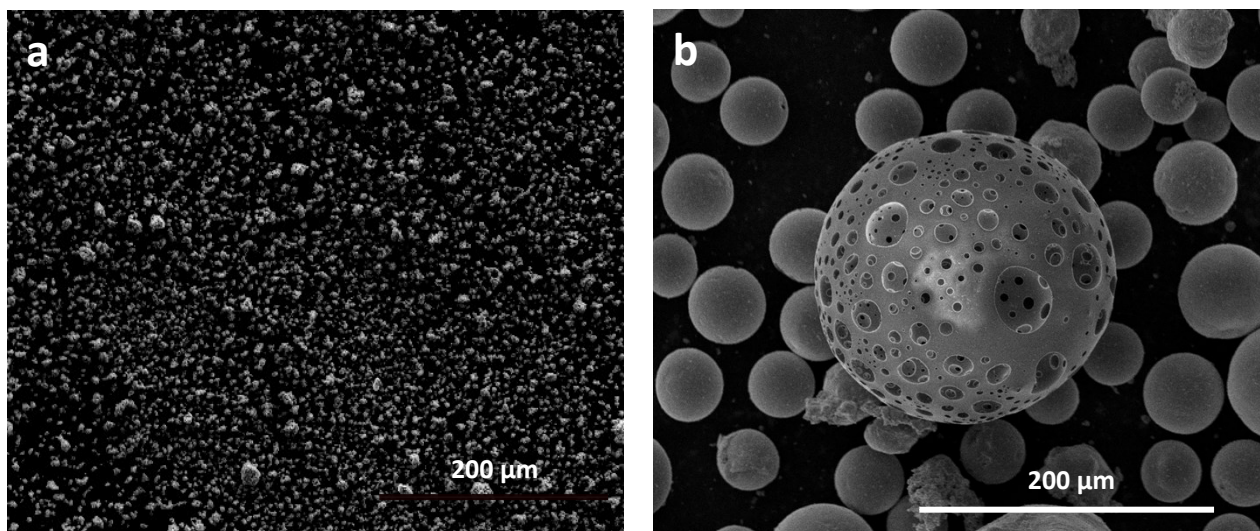

Fig. S4. a) Prepared  $\text{Fe}_3\text{O}_4 / \text{CaCO}_3$  mixture with PVA. Powder used for both FS and HT-XRD analysis; b)  $\text{Ca}_2\text{Fe}_2\text{O}_5$  porous microsphere (centre) and dense microspheres (background) after FS processing.

#### 5.0 Surface analysis

Complementary X-ray photoelectron spectroscopy (VG ESCALab Mark II X-ray Photoelectron and Scanning Auger Spectrometer; Al  $K\alpha$  source; 20 mA; 20 kV; step 1; No. of scans 2; dwell 0.2; pass energy 50 eV, Constant Analyser Energy mode) study was performed to analyse the surface chemistry of the FS-processed  $\text{Ca}_2\text{Fe}_2\text{O}_5$  porous and dense microspheres. Figure S5 presents a survey spectra of the srebrodolskite microspheres.

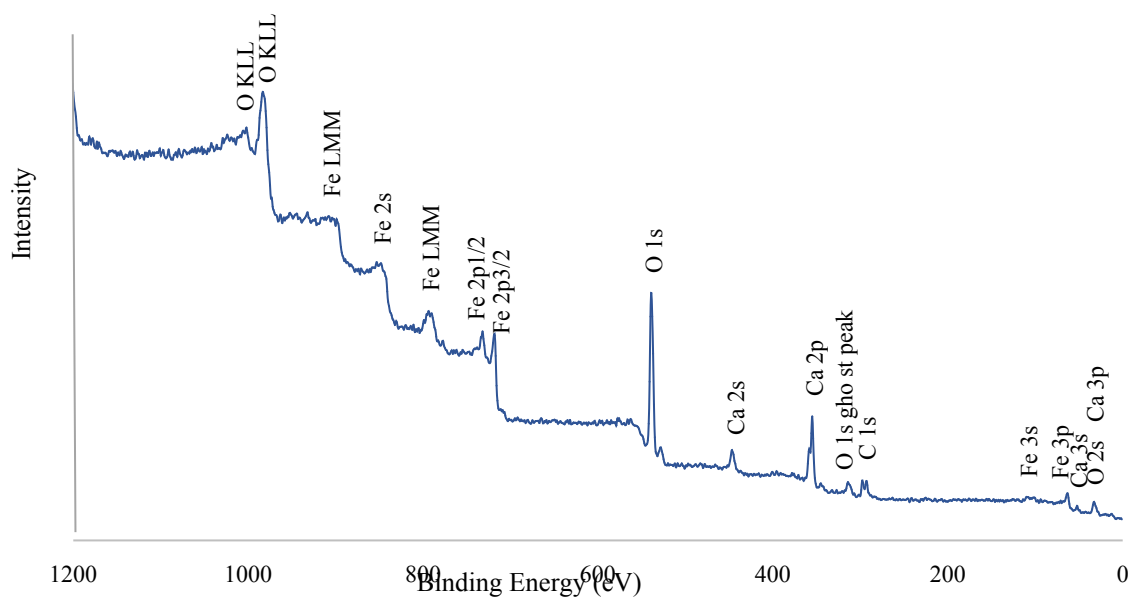

Fig. S5. XPS of FS-processed  $\text{Ca}_2\text{Fe}_2\text{O}_5$  porous and dense microspheres.
